# Supplementary material
Source: HighWire-hosted journal article supplement (https://cmaj.ca/highwire/filestream/150811/field_highwire_adjunct_files/4/231485-res-5-at.pdf)
Supplement: 231485-res-5-at.pdf [file 231485-res-5-at.pdf]

## Appendix 5. Therapeutic benefit rating methods

| Steps                                                                                                                                                                                                                     | Organizations                                                                                                                                                                                                                                                                                                                 | Major                                        | Moderate                                                        | Little to no                                                                        |
|---------------------------------------------------------------------------------------------------------------------------------------------------------------------------------------------------------------------------|-------------------------------------------------------------------------------------------------------------------------------------------------------------------------------------------------------------------------------------------------------------------------------------------------------------------------------|----------------------------------------------|-----------------------------------------------------------------|-------------------------------------------------------------------------------------|
| <b>Main analysis</b>                                                                                                                                                                                                      |                                                                                                                                                                                                                                                                                                                               |                                              |                                                                 |                                                                                     |
| Step 1: the highest rating of the three organizations                                                                                                                                                                     | PMPRB<br><a href="https://www.canada.ca/en/patented-medicine-prices-review/services/annual-reports.html">https://www.canada.ca/en/patented-medicine-prices-review/services/annual-reports.html</a>                                                                                                                            | Breakthrough, substantial improvement        | Moderate improvement – primary, moderate improvement –secondary | Slight or no improvement                                                            |
|                                                                                                                                                                                                                           | IQWiG<br><a href="https://www.iqwig.de/en/presse/media-centre/annual-reports/">https://www.iqwig.de/en/presse/media-centre/annual-reports/</a>                                                                                                                                                                                | Major added benefit                          | Considerable added benefit                                      | Minor added benefit, non-quantifiable added benefit, no added benefit, less benefit |
|                                                                                                                                                                                                                           | Prescrire International<br><a href="https://english.prescrire.org/en/81/168/46800/0/NewsDetails.aspx">https://english.prescrire.org/en/81/168/46800/0/NewsDetails.aspx</a><br><a href="https://english.prescrire.org/en/81/168/64261/0/NewsDetails.aspx">https://english.prescrire.org/en/81/168/64261/0/NewsDetails.aspx</a> | Bravo, a real advance                        | Offers an advantage                                             | Possibly helpful, nothing new, not acceptable                                       |
| Step 2: molecules with missing ratings after Step 1 were rated as major benefit based on US FDA designation of breakthrough therapy                                                                                       | FDA CDER<br><a href="https://www.fda.gov/drugs/nda-and-bla-approvals/breakthrough-therapy-approvals">https://www.fda.gov/drugs/nda-and-bla-approvals/breakthrough-therapy-approvals</a>                                                                                                                                       | Breakthrough therapy approvals               |                                                                 |                                                                                     |
| <b>Sensitivity analysis</b>                                                                                                                                                                                               |                                                                                                                                                                                                                                                                                                                               |                                              |                                                                 |                                                                                     |
| Step 3: molecules with missing ratings after Step 2 were rated based on US FDA designation of first-in-class and priority review                                                                                          | FDA CDER<br><a href="https://www.fda.gov/drugs/new-drugs-fda-cders-new-molecular-entities-and-new-therapeutic-biological-products/new-drug-therapy-approvals-2022">https://www.fda.gov/drugs/new-drugs-fda-cders-new-molecular-entities-and-new-therapeutic-biological-products/new-drug-therapy-approvals-2022</a>           | first-in-class and priority review approvals | first-in-class or priority review approvals but not both        | Neither first-in-class nor priority review approvals                                |
| PMPRB: the Patented Medicine Prices Review Board; IQWiG: the Institute for Quality and Efficiency in Health Care; US: the United States; FDA: Food and Drug Administration; CDER: Center for Drug Evaluation and Research |                                                                                                                                                                                                                                                                                                                               |                                              |                                                                 |                                                                                     |
